1                   **Transmission of pre-XDR and XDR-TB in the Mumbai Metropolitan Region, India**

2

3

4 Viola Dreyer<sup>&,1,5</sup>, Ayan Mandal<sup>2,&</sup>, Prachi Dev<sup>2,&</sup>, Matthias Merker<sup>1</sup>, Ivan Barilar<sup>1</sup>, Christian Utpatel<sup>1</sup>,  
5 Kayzad Nilgiriwala<sup>2</sup>, Camilla Rodrigues<sup>3</sup>, Derrick W. Crook<sup>4</sup>, the CRyPTIC Consortium<sup>5</sup>, Nerges  
6 Mistry<sup>2,5</sup>, Stefan Niemann<sup>5,1,6</sup>

7

8 <sup>1</sup>Molecular and Experimental Mycobacteriology, Research Center Borstel, Germany

9 <sup>2</sup>The Foundation for Medical Research, Dr. Kantilal J. Sheth Memorial Building, 84-A, R. G. Thadani  
10 Marg, Worli, Mumbai - 400 018, India

11 <sup>3</sup>Department of Microbiology, P. D. Hinduja National Hospital and Medical Research Centre, Mumbai,  
12 India

13 <sup>4</sup>Nuffield Department of Medicine, University of Oxford, Oxford, UK.

14 <sup>5</sup>CRyPTIC Consortium. Author list in supplement.

15 <sup>6</sup>German Center for Infection Research (DZIF), Partner Site Hamburg-Lübeck-Borstel-Riems, Germany;

16

17 **&equal contribution**

18 **§equal contribution**

19

20 Corresponding author: Stefan Niemann, Molecular and Experimental Mycobacteriology,  
21 Forschungszentrum Borstel, Parkallee 1, D-23845 Borstel, Germany. Phone: (49) 4537 1887620; Fax:  
22 (49) 4537 188 -2091 E-mail: [sniemann@fz-borstel.de](mailto:sniemann@fz-borstel.de).

23

24

25

26

27

28

29

30

31

32

33

34

35 **Abstract**

36 Multidrug-resistant (MDR) and extensively drug resistant (XDR) *Mycobacterium tuberculosis* complex  
37 (MTBC) strains are a great challenge for tuberculosis (TB) control in India. Still, factors driving the  
38 MDR/XDR epidemic in India are not well defined.

39 To address this, whole genome sequencing (WGS) data from 1 852 MTBC strains obtained from  
40 patients from a tertiary care hospital laboratory in Mumbai were used for phylogenetic strain  
41 classification, resistance prediction, and cluster analysis (12 allele distance threshold). Factors  
42 associated with pre-XDR/XDR-TB were defined by odds ratios and a multivariate logistic regression  
43 model.

44 Overall, 1 017 MTBC strains were MDR, out of which 57.8 % (n=591) were pre-XDR, and 17.9 % (n=183)  
45 were XDR. Lineage 2 (L2) strains represented 41.7 % of the MDR, 77.2 % of the pre-XDR, and 86.3 % of  
46 the XDR strains, and were significantly associated with pre-XDR/XDR-TB ( $P < 0.001$ ). Cluster rates were  
47 high among MDR (78 %) and pre-XDR/XDR (85 %) strains with three dominant L2 strain clusters (Cl 1-  
48 3) representing half of the pre-XDR and two thirds of the XDR-TB cases. Cl 1 strains accounted for  
49 52.5 % of the XDR MTBC strains. Transmission could be confirmed by identical mutation patterns of  
50 particular pre-XDR/XDR strains.

51 As a conclusion high rates of pre-XDR/XDR strains among MDR-TB patients require rapid changes in  
52 treatment and control strategies. Transmission of particular pre-XDR/XDR L2 strains is the main driver  
53 of the pre-XDR/XDR-TB epidemic. Accordingly, control of the epidemic in the region requires measures  
54 with stopping transmission especially of pre-XDR/XDR L2 strains.

55

55 **Introduction**

56 Multidrug-resistant (MDR) tuberculosis (TB) caused by *Mycobacterium tuberculosis* complex (MTBC)  
57 strains resistant to at least isoniazid (INH) and rifampicin (RMP) poses a great challenge to global TB  
58 control. More than 400 000 new MDR-TB cases are notified annually <sup>1</sup>; 50 % of these coming from India  
59 (27 %), China (14 %) and countries of the Russian Federation (9 %). This makes them the epi-centers of  
60 the current MDR-TB epidemic and key countries for the successful future intervention against MDR-  
61 TB<sup>1</sup>. Approx. 6 % of MDR-TB cases are already estimated to be extensively drug resistant (XDR,  
62 additional resistance to one of the fluoroquinolones [FQs] as well as to one of the injectable drugs,  
63 amikacin [AMI], capreomycin [CAP], or kanamycin [KAN])<sup>2,3</sup>.

64 The treatment of MDR-TB patients is longer, based on less effective, more toxic drugs, and in 2019,  
65 the cure rate was only 57 % on a global level<sup>1,3</sup>. With 39 %, the treatment success rate is even lower  
66 for XDR-TB patients<sup>2</sup>. As ineffective treatment is an important factor driving transmission<sup>4</sup>, the  
67 potential of MDR/XDR MTBC strains to transmit may be even higher compared to susceptible MTBC  
68 strains<sup>5</sup>.

69 As outlined above, India is particularly affected and, thereby becomes one of the main drivers of the  
70 current MDR/XDR-TB epidemic. Few studies on MDR/XDR-TB in India underlines the urgent need to  
71 gain more and better knowledge of the genetics of resistance determinants, evolution and  
72 transmission, of MDR/XDR MTBC strains in the region<sup>6,7</sup>. Indeed, it is of particular importance to  
73 understand the origins and driving forces of the MDR/XDR-TB epidemic in the country including  
74 ongoing transmission of already highly resistant clones<sup>8-10</sup>, but only few studies have used state-of-  
75 the-art whole genome sequencing (WGS) combined with epidemiological techniques to investigate  
76 transmission in India so far<sup>11-14</sup>.

77 To address these knowledge gaps, we performed a retrospective genomic epidemiological analysis  
78 based on WGS of 2 040 MTBC strains mainly from the Mumbai metropolitan region, India. The strains  
79 were obtained from a tertiary care hospital laboratory in Mumbai, which providing comprehensive  
80 drug susceptibility testing (DST) of MTBC strains. WGS data were used to determine MTBC-lineage,

- 81 resistance to first- and second-line drugs, and transmission inference of MTBC strains based on  
82 sequence-based cluster analysis.

## 83 **Results**

### 84 **Study population**

85 Over the study period, MTBC strains were obtained from 2 040 patients. These strains were sent to  
86 the laboratory of the tertiary care hospital in Mumbai from private physicians practicing in India,  
87 mainly the Mumbai Metropolitan Region (Figure S1).

88 WGS data quality was sufficient for 1 852 strains (90.8 %), while WGS data of 188 isolates were  
89 excluded from data analysis: 22 had a coverage of below 40x, in seven samples the proportion of  
90 unambiguous reads were below 85 %, another 40 samples had mixed infections with two MTBC strains  
91 and 119 had technical errors arising due to discrepancies in levofloxacin drug susceptibility testing  
92 between genotypic and phenotypic DST (Figure 1).

93 Of the 1 852 patients, 55.5 % (n = 1 027) were female, and 44.5 % (n = 824) were male. TB cases were  
94 mostly diagnosed within the age group of 18 to 40 years (n = 1 081; 58.4 %) and were widely  
95 distributed in Mumbai and its suburban region (Figure S1, Table S3). The mean age of the whole  
96 population was 33.7 years (SD 16.3). All data are summarized in Table S4.

### 97 **Drug resistance and MTBC population structure**

98 1 017 were classified as MDR (54.9 %) and 835 as not MDR, including 681 (36.8 %) pan-susceptible  
99 strains and 154 strains with variable resistances other than MDR (8.3 %, Figure 2, Table S3). Among  
100 the 1 017 MDR strains, 588 strains were pre-XDR (31.7 % of the total population, and 57.8 % of the  
101 MDR MTBC strains), and 182 XDR (9.8 % of the total population, and 17.9 % of the MDR MTBC strains,  
102 Figure 2, Table S3, Table S4).

103 Lineage 2 strains (L2, Beijing/East Asia) constituted 41 % of the total collection (n = 756), followed by  
104 Lineage 3 (L3, Delhi/CAS, n = 531, 29 %), Lineage 1 (L1, East Africa Indian, EAI, n = 303, 16 %) and  
105 Lineage 4 (L4, Euro-American, n = 260, 14 %) strains (Figure 2). L2 strains are overrepresented in drug  
106 resistance strains, especially in those harboring multiple drug resistances, while strains of the other

107 three lineages show an opposite trend. Indeed, 77 % of all pre-XDR and 86 % of all XDR strains belong  
108 to L2 (Table S3).

### 109 **Genome based cluster analysis**

110 A cgMLST-based cluster analysis employing a threshold of a maximum allele distance of 12 alleles  
111 grouped 801 (43 %) of the 1 852 strains into 96 clusters, ranging in size from two to 258 strains (Figure  
112 S2, Table S4). The three biggest clusters comprise 258 (cluster 1), 127 (cluster 2) and 87 (cluster 3)  
113 strains. Clustered strains comprise all four major MTBC-lineages, however, all strains of the three  
114 largest allele clusters were L2 strains (Figure 2, Table S3). If the different resistance categories were  
115 considered, the cluster rate was 55.1 % in MDR, 77.7 % in pre-XDR and 84.6 % in XDR strains (Table  
116 S3).

117 Cluster 1-3 strains were close to 100 % resistant to INH, RMP, EMB, PZA, and SM, while only PZA  
118 resistance rate was lower in cluster 3 strains (11.5 %, Figure S3) and also developed high FQ resistance  
119 rates (84.1 %) rendering them at least pre-XDR (see below). Resistance to injectable drugs was 42.2 %  
120 in cluster 1 strains, thus, 96 out of the 258 cluster 1 strains were classified as XDR (Figure 2, Table S3).

### 121 **Factors associated with pre-XDR/XDR-TB**

122 In the univariate statistical analysis, sex and age group were not associated with pre-XDR/XDR-TB  
123 (Table 1). L2 strains ( $P < 0.001$ ), belonging to a cluster ( $P < 0.001$ ), and belonging to clusters 1-3  
124 increased the odds of pre-XDR/XDR compared to MDR, and L1, 3, and 4 strains had a lower odd of  
125 being pre-XDR/XDR compared to MDR (Table 1).

126 In multivariate analysis, the odds of a strain being pre-XDR/XDR was twice as high for strains belonging  
127 to L2 (aOR 2.07, 95% CI 1.24, 3.46) and for strains belonging to a cluster 2 (aOR 2.37, 95% CI 1.17, 4.83),  
128 50% lower for strains belonging to lineage 3 (aOR 0.51, 95% CO 0.31, 0.85) and 80 % lower for strains  
129 belonging to lineage 1 (aOR 0.18, 95 % CI 0.31, 0.85; Table 1 and Table S5).

### 130 **High resolution SNP-based analysis of cluster 1-3 MTBC strains**

131 To get in-depth data on the transmission dynamics and evolution of the most dominant strains in our  
132 collection, we performed a high-resolution SNP-based analysis on the L2 strains of allele clusters 1-3.  
133 Using a L2 sub-classification system<sup>8</sup>, cluster 1 strains were classified as Asian/African 2 subgroup,  
134 whereas cluster 2 strains were classified as Ancestral 3 strains. Strains from cluster 3 could not be  
135 assigned to a particular previously defined L2 subgroup (Table S4).

136 Using a maximum SNP distance of 12, a total of 239 cluster 1 strains could be grouped into eight SNP-  
137 based clusters (SNP\_cl), ranging in size from two to 143 isolates (Figure 3, Table S4). The largest SNP  
138 cluster is SNP\_cl 1 with 143 isolates, followed by SNP\_cl 2 and SNP\_cl 3, which comprise 37 and 41  
139 isolates, respectively. The phylogeny of the strains in maximum likelihood phylogeny based on the  
140 concatenated SNP sequence (356 parsimony-informative, 961 singleton sites, 1 106 constant sites) is  
141 in line with particular resistance types, and, thus, confirmed the clonality of the isolates in particular  
142 sub-branches e.g. by carrying the same *rpoB*, *embB*, or *pncA* mutations (Figure 3).

143 The close relationship and likely transmission of pre-XDR and XDR strains was further confirmed by the  
144 grouping of isolates into several closely related subgroups in the phylogeny that share the same FQ  
145 and injectable drug resistance mutations e.g. *eis* -12c/t, *eis* -10g/t, *gyrA* 90V, or even double mutations  
146 such as *gyrA* 90V and *gyrA* D94G (Figure 3, Table S4), pointing towards a common ancestor that  
147 acquired these mutations before the clone started spreading as pre-XDR/XDR in the Mumbai area. In  
148 cluster 1 117 (89.3 %) of the 131 pre-XDR MTBC strains carried a mutation that leads to FQ resistance,  
149 which makes those strains already comparable with XDR MTBC strains from a clinical point of view.  
150 Only 13 (9.9 %) were resistant to an injectable drug, but susceptible to FQs.

151 To test if strains of particular subgroups were spreading in certain areas in Mumbai, we linked the SNP  
152 clusters with geographical occurrence (Figure 4). However, this analysis confirmed that strains of all  
153 cluster 1 SNP subgroups occur in all parts of the study region indicating wide-spread of these clones.  
154 Finally, we screened the NGS datasets for compensatory mutations that have been previously  
155 described to enhance the transmissibility of MDR strains<sup>8,9,15</sup>. This analysis revealed that 243 of the 258  
156 cluster 1 strains carry at least one compensatory mutation in *rpoC* (Table S4).

157 SNP-based analysis of strains from cluster 2 and 3 confirmed their high clonality with virtually all strains  
158 belonging to 1 SNP group (Figure S4). The phylogeny of cluster 2 and 3 strains reveals a similar pattern  
159 than observed for cluster 1 strains. Sub-groups share same patterns of resistance mutations indicating  
160 their acquisition by a common ancestor followed by clonal transmission (Figure S4). This also applies  
161 for pre-XDR and/or XDR MTBC strains.



## 162 Discussion

163 Our large-scale genome-based study analyzing 1 852 MTBC strains from India, mainly the Mumbai  
164 Metropolitan region, revealed several remarkable findings shedding light on the MDR, pre-XDR and  
165 XDR epidemic in one of the highest populated metropolitan areas of the world. First, we determined  
166 high rates of pre-XDR, and XDR strains among the MDR strain population in this study. Indeed, 58.4 %  
167 of all MDR strains are already pre-XDR and 17.9 % are XDR. This remarkable shift towards pre-XDR is  
168 mediated by high frequencies of FQ resistance mutations that, in combination with particular  
169 injectable drug resistance mutations, result in XDR-TB. In addition, pre-XDR, and XDR strains are  
170 virtually all L2 strains and show high cluster rates as an indication of ongoing transmission.

171 On a global level, the WHO reports that approximately 6 % of the MDR-TB patients have an XDR-TB<sup>2</sup>.  
172 With 17.9 %, the XDR-TB rate is clearly higher in our study population. Additionally, we observed a high  
173 rate (58.4 %) of pre-XDR strains with FQ resistance, thus, rendering one of the most effective drugs of  
174 the short and long MDR-TB regimen non-effective<sup>16</sup>. Indeed, *gyrA* D94G (41%) and *gyrA* A90V (21%)  
175 were observed as the predominant mutations in the FQ resistant strains from India in the CRyPTIC  
176 project (unpublished data), the former mutation contributing to high level resistance (unpublished  
177 data).

178 To the best of our knowledge, a comparable shift of resistance from MDR towards pre-XDR and XDR  
179 has not been reported from other regions, though it has been evident in Mumbai over the last two  
180 decades<sup>7,17,18</sup>. Our data underline the potential of MDR MTBC strains to evolve further resistance and  
181 yet efficiently transmit even when they become pre-XDR and XDR.

182 Ongoing and effective transmission of MDR, pre-XDR, and XDR MTBC strains is further confirmed by  
183 subgroups of clustered strains, that share identical variant sites conferring resistance including FQ  
184 resistance and injectable drug resistance mutations. The clonal expansion of particular pre-XDR/XDR  
185 clones with combined resistance to all first line drugs and FQs reduces available group A, B, and C drugs  
186 proposed for the treatment of MDR-TB cases to a minimal set. This renders use of the short MDR-TB

187 regimen impossible for patients infected with such strains<sup>2,16</sup>. Geographical mapping showed that  
188 strains of the dominant cluster 1 are dispersed across all districts of the Mumbai metropolitan area of  
189 more than 28 million inhabitants.

190 A further striking finding of our study is strong association of L2 strains with pre-XDR/XDR-TB linked  
191 with a very high cluster rate (85 %) of L2 strains. Indeed, strains of the three major L2 clusters account  
192 for half of the pre-XDR and two thirds of all XDR-TB cases, and just cluster 1 strains account for 52.1 %  
193 of the XDR MTBC strains. The proportion of Beijing strains in Mumbai increased over the last two  
194 decades<sup>7,17,19</sup>. These data highlight the insights sequence based molecular epidemiological analysis  
195 reveals on how an MDR/pre-XDR/XDR epidemic emerges and becomes prevalent in a densely  
196 populated geographic area. In fact, the challenge to control pre-XDR/XDR-TB in Mumbai specifically  
197 requires intensification of drug resistance detection, effective drug treatment and transmission control  
198 of clusters 1-3 strain. Robust monitoring is required for detection and control of new emergent, fit,  
199 and transmissible multi-resistant lineages. An earlier study has already highlighted the competitive  
200 fitness of MDR strains from India using growth competition experiments<sup>20</sup>. An association between  
201 BCG vaccine escape and efficient spread of Beijing strains has also been proposed<sup>21,22</sup>.

202 The clonality of the MDR/pre-XDR/XDR MTBC strains in our collection is remarkable. Previously, we  
203 determined dominant MDR clones in Eastern European settings, and could show that the spread of a  
204 few dominant MDR MTBC strains with compensatory mutations e.g. in *rpoC* can significantly affect the  
205 MDR-TB epidemic in specific regions<sup>8,9,23,24</sup>. However, pre-XDR and XDR-TB cases have until now been  
206 found at a comparably lower frequency and FQ resistance has not been present in more than 30% of  
207 the isolates<sup>8,9,23,24</sup>. Thus, our data extend these findings to pre-XDR/XDR-TB and demonstrate that pre-  
208 XDR/XDR-TB can be propelled by a few lineages that have obviously acquired compensatory mutations,  
209 transmit efficiently and reach high prevalence in the population.

210 Our study has limitations. We only investigated MTBC strains from the laboratory of one tertiary care  
211 hospital in Mumbai which represents community samples from a pool of private physicians from the  
212 MMR. Although our study covered approx. 16 % of MDR cases in occurring in the region, it may not be

213 representative for the whole Mumbai metropolitan area and for the rest of India. Still, our geographical  
214 mapping shows that the study captured cases from the main districts of Mumbai as well as from other  
215 areas in India. However, considering our findings, larger investigations on the MDR/pre-XDR/XDR  
216 proportions and on the spread of dominant pre-XDR/XDR MTBC strains in Mumbai and other parts of  
217 India urgently need to be performed.

218 In conclusion, our data indicate that the majority of pre-XDR/XDR-TB cases are caused by highly  
219 transmissible L2 lineages. Thus, successful control in Mumbai of the DR epidemic urgently requires  
220 measures for stopping the transmission of MDR/pre-XDR/XDR strains of the Beijing lineage. As the  
221 majority of pre-XDR strains are already FQ resistant, treatment options are limited and rapid  
222 adaptation of treatment strategies, for example, comprehensive resistance detection for better design  
223 of personalized effective treatment regimens need to be established. It is likely, that the uninformed  
224 use of treatment regimens including the newest MDR-TB drugs without precise knowledge of  
225 individual resistance patterns and close patient monitoring will likely result in further resistance  
226 development as described already<sup>25-28</sup> and ongoing transmission of even more resistant strains. The  
227 national extent of spread in India by the dominant pre-XDR/XDR clones identified in Mumbai and other  
228 regions needs to be urgently considered.

229 **Methods**

230 **Study design**

231 A total of 2 040 MTBC strains from patients were retrospectively collected as random sequential  
232 samples for the CRyPTIC Consortium Project between February 2017 and May 2018 (15 months) from  
233 the laboratory of a tertiary care hospital in India and sequenced with an WGS approach. Considering  
234 that in Mumbai around 5 000 MDR cases are reported annually, the study covered approx. 16 % of  
235 MDR cases occurring in the region (n = 1 017/6 250) (source: <https://portal.mcgm.gov.in/>)<sup>29</sup>. One  
236 hundred and eighty-eight isolates were excluded from analysis due to sequence deficiencies. A  
237 majority (n = 1 773) of the remaining isolates (n = 1 852) were collected from the Mumbai  
238 Metropolitan region (MMR) of the western State of Maharashtra while 46 were derived from distal  
239 parts of Maharashtra and neighboring States/Union Territories and 33 from Delek Hospital, Himachal  
240 Pradesh, North India. Approval for the CRyPTIC study was obtained from the Health Ministry's  
241 Screening Committee (HMSC), Government of India dated 6<sup>th</sup> October 2016. Approval was also  
242 obtained from the Institutional Ethics Committee (IEC) of The Foundation for Medical Research,  
243 Mumbai (Ref nos. FMR/IEC/TB/01a/2015 and FMR/IEC/TB/01b/2015) and Institutional Review Board  
244 of P.D. Hinduja Hospital and Medical Research Centre, Mumbai (Ref no. 915-15-CR [MRC]).

245 **Molecular methods**

246 Genomic DNA was isolated from the 2 040 patient samples using FastPrep24 lysis method (MP  
247 Biomedicals, California, USA) as per standard protocol and quantified using Qubit (Life Technologies,  
248 Carlsbad, California, USA). Libraries for WGS were prepared using Nextera XT DNA Library Prep Kit and  
249 sequencing was performed on the Illumina NextSeq500 machine as per manufacturer's protocol  
250 (Illumina Inc., San Diego, California, USA) producing 2 x 151 base pair reads.

251 **Genome analysis**

252 All WGS data were analyzed using the MTBSeq pipeline (Version 1.0.3)<sup>30</sup>. Details are described in  
253 supplemental methods (Text S1). Phylogenetic lineages (MTBC-lineages and known Beijing subgroups)  
254 were inferred from specific SNPs based on Coll *et al.* 2014<sup>31</sup> and Merker *et al.* 2015<sup>8</sup>.

### 255 **Genome based resistance prediction and cluster analysis**

256 Polymorphisms in 27 drug resistance associated genes that are involved in drug resistance mechanisms  
257 and three compensatory target genes (*rpoA*, *rpoC*, compensate fitness effects of *rpoB* mutations in RR  
258 strains<sup>15</sup> and *ahpC* upstream region, compensate fitness effects of catalase [*katG*] deficit in INH  
259 resistant strains<sup>32</sup>) were analyzed (Table S2).

260 Wild type gene sequences (*M. tuberculosis* H37Rv reference sequence or synonymous/silent  
261 mutations) were interpreted susceptible, known resistance variants<sup>33</sup> were considered as resistant, as  
262 well as insertion and deletions in the following genes: *katG*, *rpoB*, *pncA*, *ethA*, *Rv0678*, *ald* and *ddn*.

263 Primary cluster analysis was done using the cgMLST method as described previously<sup>34</sup>. Reference  
264 mapped reads were uploaded to the Ridom SeqSphere+ software (version 7.0.4)<sup>34</sup> and analyzed with  
265 the predefined *M. tuberculosis* cgMLST scheme v2 (version 2.1), comprising 2 891 gene targets. A  
266 minimum spanning tree was calculated using a cluster alert of 12 alleles distance and the pairwise  
267 ignorance of missing values. The minimum cluster size was set to two.

268 SNP-based phylogenies were calculated as described previously<sup>33</sup>. The SNP-based phylogenetic  
269 analysis was performed by excluding regions annotated as repetitive elements (e.g. PPE and PE-PGRS  
270 gene families), InDels, multiple consecutive SNPs in a 12-bp window (possible InDel artefacts or rare  
271 recombination scars), and positions in 92 genes implicated in antibiotic resistance (supplementary  
272 Table S1). For the phylogenetic reconstruction the SNP frequency was set to 75 % and a genome  
273 position was considered valid when 95 % of the combined strains had enough coverage (four reads per  
274 direction) at this position.

275 We used the concatenated sequence alignment to calculate a maximum likelihood phylogeny using  
276 IQ-TREE software<sup>35</sup> with ModelFinder option and ascertainment bias correction. We include also

277 ultrafast bootstrap (UFBoot) approximation with 1 000 replicates combined with a further optimizing  
278 step to reduce the risk of overestimating the branch support. Phylogenetic trees were mid-point  
279 rooted using FigTree v1.4.4 and annotated using the online tool EvolView<sup>36</sup>.

## 280 **Statistics**

281 Descriptive statistics was performed for patients' demographics as well as for lineages, resistance  
282 categories and clustering status of MTBC strains. Data derived from genomic analysis of clinical  
283 isolates were analyzed statistically using IBM SPSS Statistics Software for Windows (version 19) and R  
284 (version 3.6.1). For univariate analysis of potential factors associated with pre-XDR/XDR TB we  
285 performed a Fisher's exact test. Factors with a significant result in the univariate model were  
286 included into a multivariate logistic regression analysis. Odds ratios with 95 % confidence interval (CI)  
287 were estimated and variables with P values less than 0.05 were taken as significant characteristics.

288 **Data availability**

289 Fastq files are available at the European Nucleotide Archive (ENA, Table S1).

290 **Acknowledgments**

291 Parts of this work have been supported within the CRYPTIC consortium by the Bill & Melinda Gates  
292 Foundation [OPP1133541] and the Wellcome Trust [200205/Z/15/Z], the Deutsche  
293 Forschungsgemeinschaft (DFG, German Research Foundation) under Germanys Excellence Strategy –  
294 EXC 2167 Precision Medicine in Inflammation, and the Leibniz Science Campus Evolutionary Medicine  
295 of the LUNG (EvoLUNG). DWC is funded by the UK National Institutes of Health Research (NIHR)  
296 Biomedical Research Centre, Oxford. The funders had no role in study design; in the collection, analysis,  
297 and interpretation of data; in the writing of the report; and in the decision to submit the paper for  
298 publication.

299 **Funding source:** Parts of this work have been supported within the CRYPTIC consortium by the Bill &  
300 Melinda Gates Foundation [OPP1133541] and the Wellcome Trust [200205/Z/15/Z], the Deutsche  
301 Forschungsgemeinschaft (DFG, German Research Foundation) under Germanys Excellence Strategy –  
302 EXC 2167 Precision Medicine in Inflammation, and the Leibniz Science Campus Evolutionary Medicine  
303 of the LUNG (EvoLUNG). The funders had no role in study design; in the collection, analysis, and  
304 interpretation of data; in the writing of the report; and in the decision to submit the paper for  
305 publication.

306

307 **Author contributions**

308 VD, AM, PD, MM, KK, IB, CU, DWC, NM, and SN conceived the idea and designed the study, and  
309 analysed and interpreted the data. All authors contributed to obtaining and assembling the data. VD,  
310 AM, and SN wrote the initial draft of the paper. All authors contributed to data interpretation, final  
311 draft of the paper and approved the final version of the manuscript.

312

313 **References**

- 314 1 WHO | Global tuberculosis report 2020. WHO.  
315 [http://www.who.int/tb/publications/global\\_report/en/](http://www.who.int/tb/publications/global_report/en/) (accessed Nov 4, 2020).
- 316 2 WORLD HEALTH ORGANIZATION. GLOBAL TUBERCULOSIS REPORT 2019. S.I.: WORLD HEALTH  
317 ORGANIZATION, 2019.
- 318 3 Dheda K, Gumbo T, Maartens G, *et al.* The epidemiology, pathogenesis, transmission, diagnosis,  
319 and management of multidrug-resistant, extensively drug-resistant, and incurable tuberculosis.  
320 *The Lancet Respiratory Medicine* 2017; **5**: 291–360.
- 321 4 Mathema B, Kurepina NE, Bifani PJ, Kreiswirth BN. Molecular Epidemiology of Tuberculosis:  
322 Current Insights. *Clin Microbiol Rev* 2006; **19**: 658–85.
- 323 5 Yates TA, Khan PY, Knight GM, *et al.* The transmission of Mycobacterium tuberculosis in high  
324 burden settings. *The Lancet Infectious Diseases* 2016; **16**: 227–38.
- 325 6 Sharma P, Verma M, Bhilwar M, *et al.* Epidemiological profile of tuberculosis patients in Delhi,  
326 India: A retrospective data analysis from the directly observed treatment short-course (DOTS)  
327 center. *Journal of Family Medicine and Primary Care* 2019; **8**: 3388.
- 328 7 Dalal A, Pawaskar A, Das M, *et al.* Resistance Patterns among Multidrug-Resistant Tuberculosis  
329 Patients in Greater Metropolitan Mumbai: Trends over Time. *PLoS One* 2015; **10**.  
330 DOI:10.1371/journal.pone.0116798.
- 331 8 Merker M, Blin C, Mona S, *et al.* Evolutionary history and global spread of the Mycobacterium  
332 tuberculosis Beijing lineage. *Nat Genet* 2015; **47**: 242–9.
- 333 9 Merker M, Barbier M, Cox H, *et al.* Compensatory evolution drives multidrug-resistant  
334 tuberculosis in Central Asia. *Elife* 2018; **7**. DOI:10.7554/eLife.38200.
- 335 10 Sanchez-Padilla E, Merker M, Beckert P, *et al.* Detection of drug-resistant tuberculosis by Xpert  
336 MTB/RIF in Swaziland. *N Engl J Med* 2015; **372**: 1181–2.
- 337 11 Manson AL, Abeel T, Galagan JE, *et al.* Mycobacterium tuberculosis Whole Genome Sequences  
338 From Southern India Suggest Novel Resistance Mechanisms and the Need for Region-Specific  
339 Diagnostics. *Clin Infect Dis* 2017; **64**: 1494–501.
- 340 12 Chatterjee A, Nilgiriwala K, Saranath D, Rodrigues C, Mistry N. Whole genome sequencing of  
341 clinical strains of Mycobacterium tuberculosis from Mumbai, India: A potential tool for  
342 determining drug-resistance and strain lineage. *Tuberculosis (Edinb)* 2017; **107**: 63–72.
- 343 13 Advani J, Verma R, Chatterjee O, *et al.* Whole Genome Sequencing of Mycobacterium tuberculosis  
344 Clinical Isolates From India Reveals Genetic Heterogeneity and Region-Specific Variations That  
345 Might Affect Drug Susceptibility. *Front Microbiol* 2019; **10**: 309.
- 346 14 Sethi S, Hao Y, Brown SM, *et al.* Elucidation of drug resistance mutations in Mycobacterium  
347 tuberculosis isolates from North India by whole-genome sequencing. *J Glob Antimicrob Resist*  
348 2020; **20**: 11–5.
- 349 15 Comas I, Borrell S, Roetzer A, *et al.* Whole-genome sequencing of rifampicin-resistant  
350 Mycobacterium tuberculosis strains identifies compensatory mutations in RNA polymerase genes.  
351 *Nat Genet* 2012; **44**: 106–10.



- 352 16 Dheda K, Gumbo T, Maartens G, *et al.* The Lancet Respiratory Medicine Commission: 2019 update:  
353 epidemiology, pathogenesis, transmission, diagnosis, and management of multidrug-resistant and  
354 incurable tuberculosis. *Lancet Respir Med* 2019; **7**: 820–6.
- 355 17 D’souza DT, Mistry NF, Vira TS, *et al.* High levels of multidrug resistant tuberculosis in new and  
356 treatment-failure patients from the Revised National Tuberculosis Control Programme in an urban  
357 metropolis (Mumbai) in Western India. *BMC Public Health* 2009; **9**. DOI:10.1186/1471-2458-9-211.
- 358 18 Kambli P, Ajbani K, Kazi M, *et al.* Targeted next generation sequencing directly from sputum for  
359 comprehensive genetic information on drug resistant Mycobacterium tuberculosis. *Tuberculosis*  
360 (*Edinb*) 2021; **127**: 102051.
- 361 19 Almeida D, Rodrigues C, Ashavaid TF, Lalvani A, Udhwadia ZF, Mehta A. High incidence of the  
362 Beijing genotype among multidrug-resistant isolates of Mycobacterium tuberculosis in a tertiary  
363 care center in Mumbai, India. *Clin Infect Dis* 2005; **40**: 881–6.
- 364 20 Bhattar P, Chatterjee A, D’souza D, Tolani M, Mistry N. Estimating Fitness by Competition Assays  
365 between Drug Susceptible and Resistant Mycobacterium tuberculosis of Predominant Lineages in  
366 Mumbai, India. *PLOS ONE* 2012; **7**: e33507.
- 367 21 Kremer K, van der Werf MJ, Au BKY, *et al.* Vaccine-induced Immunity Circumvented by Typical  
368 *Mycobacterium tuberculosis* Beijing Strains. *Emerg Infect Dis* 2009; **15**: 335–9.
- 369 22 Hanekom M, van der Spuy GD, Streicher E, *et al.* A Recently Evolved Sublineage of the  
370 Mycobacterium tuberculosis Beijing Strain Family Is Associated with an Increased Ability to Spread  
371 and Cause Disease. *Journal of Clinical Microbiology* 2007; **45**: 1483–90.
- 372 23 Merker M, Nikolaevskaya E, Kohl TA, *et al.* Multidrug- and Extensively Drug-Resistant  
373 Mycobacterium tuberculosis Beijing Clades, Ukraine, 2015. *Emerging Infect Dis* 2020; **26**: 481–90.
- 374 24 Engström A, Antonenka U, Kadyrov A, *et al.* Population structure of drug-resistant Mycobacterium  
375 tuberculosis in Central Asia. *BMC Infect Dis* 2019; **19**: 908.
- 376 25 Andres S, Merker M, Heyckendorf J, *et al.* Bedaquiline-Resistant Tuberculosis: Dark Clouds on the  
377 Horizon. *Am J Respir Crit Care Med* 2020; **201**: 1564–8.
- 378 26 Kranzer K, Kalsdorf B, Heyckendorf J, *et al.* New World Health Organization Treatment  
379 Recommendations for Multidrug-Resistant Tuberculosis: Are We Well Enough Prepared? *Am J*  
380 *Respir Crit Care Med* 2019; **200**: 514–5.
- 381 27 Polsfuss S, Hofmann-Thiel S, Merker M, *et al.* Emergence of Low-level Delamanid and Bedaquiline  
382 Resistance During Extremely Drug-resistant Tuberculosis Treatment. *Clin Infect Dis* 2019; **69**:  
383 1229–31.
- 384 28 Hoffmann H, Kohl TA, Hofmann-Thiel S, *et al.* Delamanid and Bedaquiline Resistance in  
385 Mycobacterium tuberculosis Ancestral Beijing Genotype Causing Extensively Drug-Resistant  
386 Tuberculosis in a Tibetan Refugee. *Am J Respir Crit Care Med* 2016; **193**: 337–40.
- 387 29 The Times of India. Drug-resistant TB cases in Mumbai up 36% in 3 years. Read more at:  
388 [http://timesofindia.indiatimes.com/articleshow/63436898.cms?utm\\_source=contentofinterest&](http://timesofindia.indiatimes.com/articleshow/63436898.cms?utm_source=contentofinterest&utm_medium=text&utm_campaign=cppst)  
389 [utm\\_medium=text&utm\\_campaign=cppst](http://timesofindia.indiatimes.com/articleshow/63436898.cms?utm_source=contentofinterest&utm_medium=text&utm_campaign=cppst) (accessed Jan 20, 2021).
- 390 30 Kohl TA, Utpatel C, Schleusener V, *et al.* MTBseq: a comprehensive pipeline for whole genome  
391 sequence analysis of Mycobacterium tuberculosis complex isolates. *PeerJ* 2018; **6**: e5895.

- 392 31 Coll F, McNerney R, Guerra-Assunção JA, *et al.* A robust SNP barcode for typing *Mycobacterium*  
393 tuberculosis complex strains. *Nat Commun* 2014; **5**. DOI:10.1038/ncomms5812.
- 394 32 Sherman DR, Mdluli K, Hickey MJ, *et al.* Compensatory *ahpC* gene expression in isoniazid-resistant  
395 *Mycobacterium tuberculosis*. *Science* 1996; **272**: 1641–3.
- 396 33 Merker M, Kohl TA, Barilar I, *et al.* Phylogenetically informative mutations in genes implicated in  
397 antibiotic resistance in *Mycobacterium tuberculosis* complex. *Genome Medicine* 2020; **12**: 27.
- 398 34 Kohl TA, Harmsen D, Rothgänger J, Walker T, Diel R, Niemann S. Harmonized Genome Wide Typing  
399 of Tubercle Bacilli Using a Web-Based Gene-By-Gene Nomenclature System. *EBioMedicine* 2018;  
400 **34**: 131–8.
- 401 35 Nguyen L-T, Schmidt HA, von Haeseler A, Minh BQ. IQ-TREE: a fast and effective stochastic  
402 algorithm for estimating maximum-likelihood phylogenies. *Mol Biol Evol* 2015; **32**: 268–74.
- 403 36 Zhang H, Gao S, Lercher MJ, Hu S, Chen W-H. EvolView, an online tool for visualizing, annotating  
404 and managing phylogenetic trees. *Nucleic Acids Res* 2012; **40**: W569-572.
- 405

406 **Figures**

407

408 **Figure 1.** Study flowchart. In- and exclusion criteria for strains are reported in the two rhombuses. Final  
409 dataset consists of 1 852 strains.

410 **Figure 2.** Genotype and Resistance category distribution of strains across 1 852 isolates (Total) and  
411 within the three major clusters. **A.** Distribution of genotypes across the 1 852 isolates; Lineage 1 (EAI  
412 and EAI Manila), Lineage 2 (Beijing), Lineage 3 (Delhi- CAS) and Lineage 4 (Euro- American, H37Rv-like,  
413 Haarlem, LAM, mainly T, S-type, Ural and X-type); For the total dataset the main lineages are Lineage  
414 2 (41 %), followed by Lineage 3 (29 %) and Lineage 1 (16 %). All strains in cluster 1,2 and 3 belong to  
415 Lineage 2. **B.** Distribution of resistance category across the 1852 isolates; Resistance categories are RR  
416 (Rifampicin Resistant), non MDR (resistant, but not multi drug resistant [MDR]), MDR, pre-XDR (pre-  
417 extensively drug resistant) and XDR (extensively drug resistant); of the total strain population about  
418 37 % are susceptible (S) to all drugs, 32 % of strains are pre-XDR whereas 10 % are XDR in the cohort.  
419 The resistant category distribution of cluster 1, 2 and 3 differs, with all strains being at least MDR and  
420 up to 37 % of strains being already XDR (Cluster 1).

421 **Figure 3.** Maximum likelihood phylogeny based on the concatenated SNP sequence of 258 MTBC  
422 strains from allele-based cluster 1. The concatenated SNP sequence consists of 356 parsimony-  
423 informative, 961 singleton sites and 1 106 constant sites; mutations related to respective drugs and  
424 resistance status are color coded and expressed as annotation rings on the tree. SNP-based clusters  
425 with maximum distance of 12 (d12) is plotted on the outer ring. Abbreviations: INH, Isoniazid; EMB,  
426 Ethambutol; PZA, Pyrazinamide; FQ, Fluoroquinolones.

427 **Figure 4:** Geographical occurrence of patients with maximum SNPs distance of 12 for Cluster 1 across  
428 Mumbai Metropolitan Region (MMR). The geographical distribution underlines the widespread of all  
429 cluster 1 SNP subgroups across the city and its neighboring areas. Boundaries of the map for the  
430 neighboring regions are not available online.

431

432

Figure 1

2040 samples were collected during study period

DNA extraction and Whole Genome Sequencing

Data processing with MTBseq pipeline

Coverage > 40x  
Unambiguous reads > 85%

Yes

No

Exclusion (n = 22)  
Exclusion (n = 7)

Mixed infection  
Disconcordance  
pDST

No

Yes

Exclusion (n = 40)  
Exclusion (n = 119)

Final dataset  
(n=1852)

Upload to SeqSphere  
for cgMLST

Phylogenetic analysis

Figure 2 A

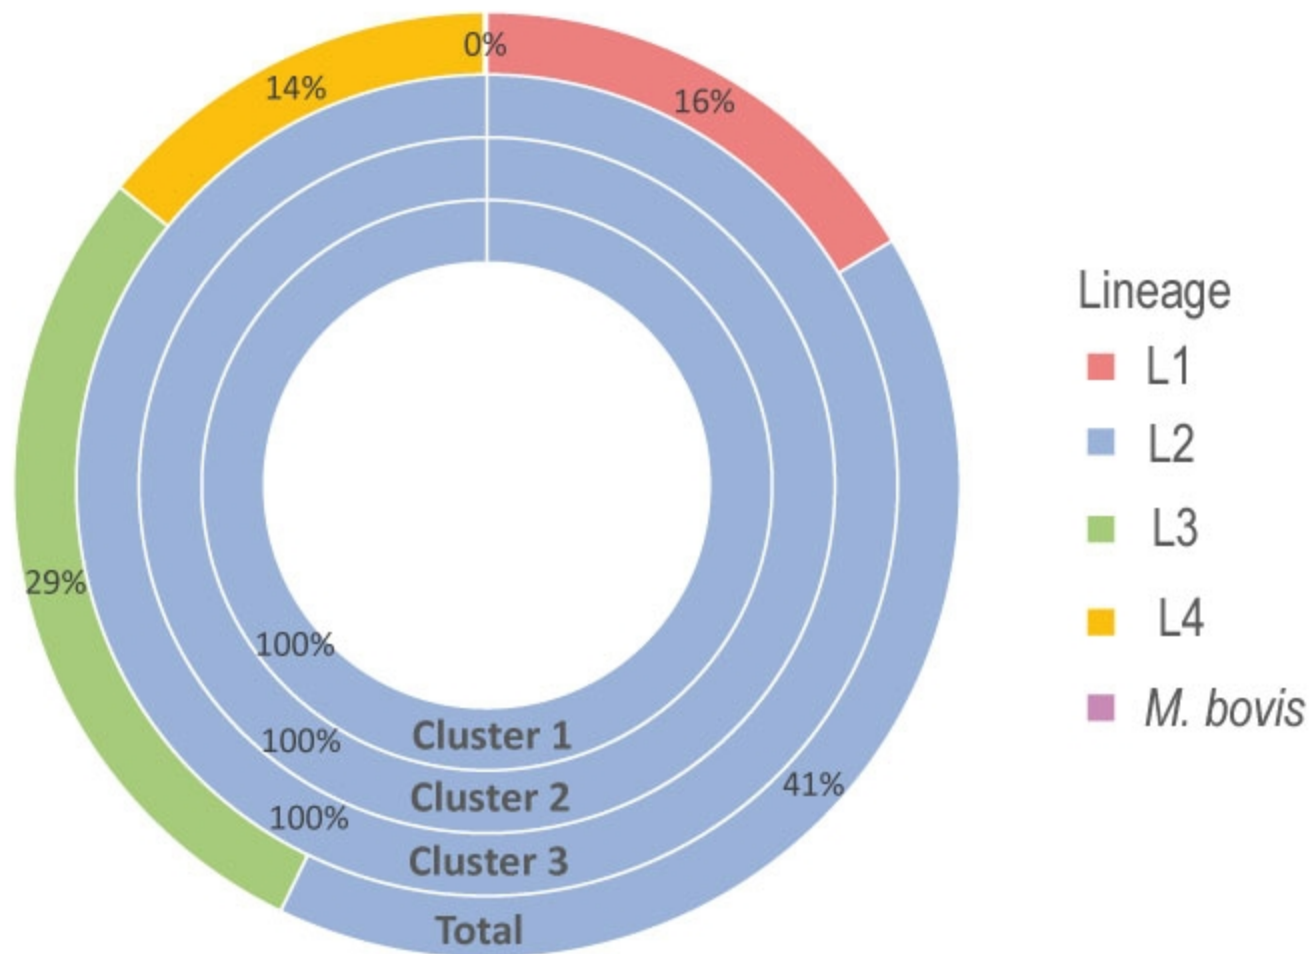

Figure 2 B

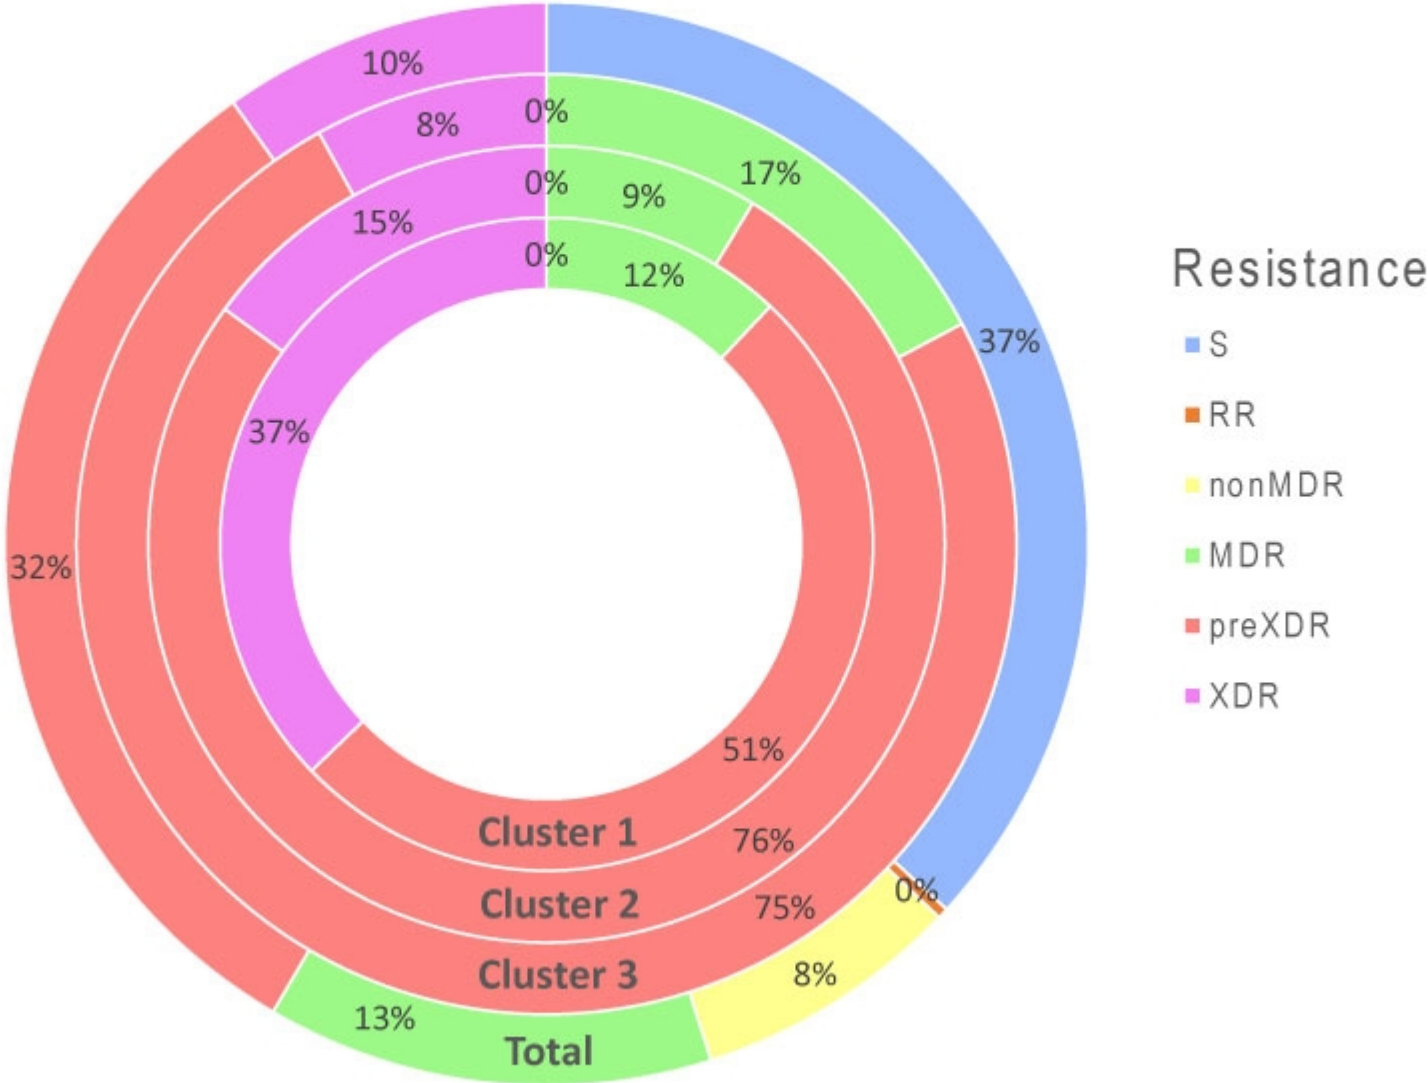

Figure 3

1 Resistance status

- MDR
- preXDR
- XDR

2 rpoB mutation

- rpoB Q432K
- rpoB S450L

3 INH mutations

- katG S315T
- fabG1 -15c>t and katG S315T
- fabG1 -8t>a and katG S315T
- fabG1 -8t>c and katG S315T
- fabG1 L203L and katG S315T
- fabG1 L203L and katG S315T

4 FQ mutations

- gyrA A90V
- gyrA A90V and gyrA D94A
- gyrA A90V and gyrA D94G
- gyrA A90V and gyrA D94N
- gyrA A90V and gyrA S91P
- gyrA A90V and gyrA S91P and gyrA D94G
- gyrA D94A
- gyrA D94G
- gyrA D94H
- gyrA D94N
- gyrA D94Y
- gyrA S91P
- gyrB D461A
- gyrB D461N
- gyrB N499T
- gyrB N499T and gyrA D94A
- gyrB N499T and gyrA D94A
- gyrB T500P

5 Injectable mutations

- rrs 1401a>g
- eis -12c>t
- eis -10g>c
- eis -37g>t
- rrs 1484g>t
- eis -10g>a
- rrs 1401a>g and eis -10g>c
- rrs 1401a>g and eis -12c>t
- eis -12c>t and eis -37g>t
- rrs 1401a>g and eis -14c>t

6 SNP cluster d12

- SNP\_cl 1
- SNP\_cl 2
- SNP\_cl 3
- SNP\_cl 4
- SNP\_cl 5
- SNP\_cl 6
- SNP\_cl 7
- SNP\_cl 8

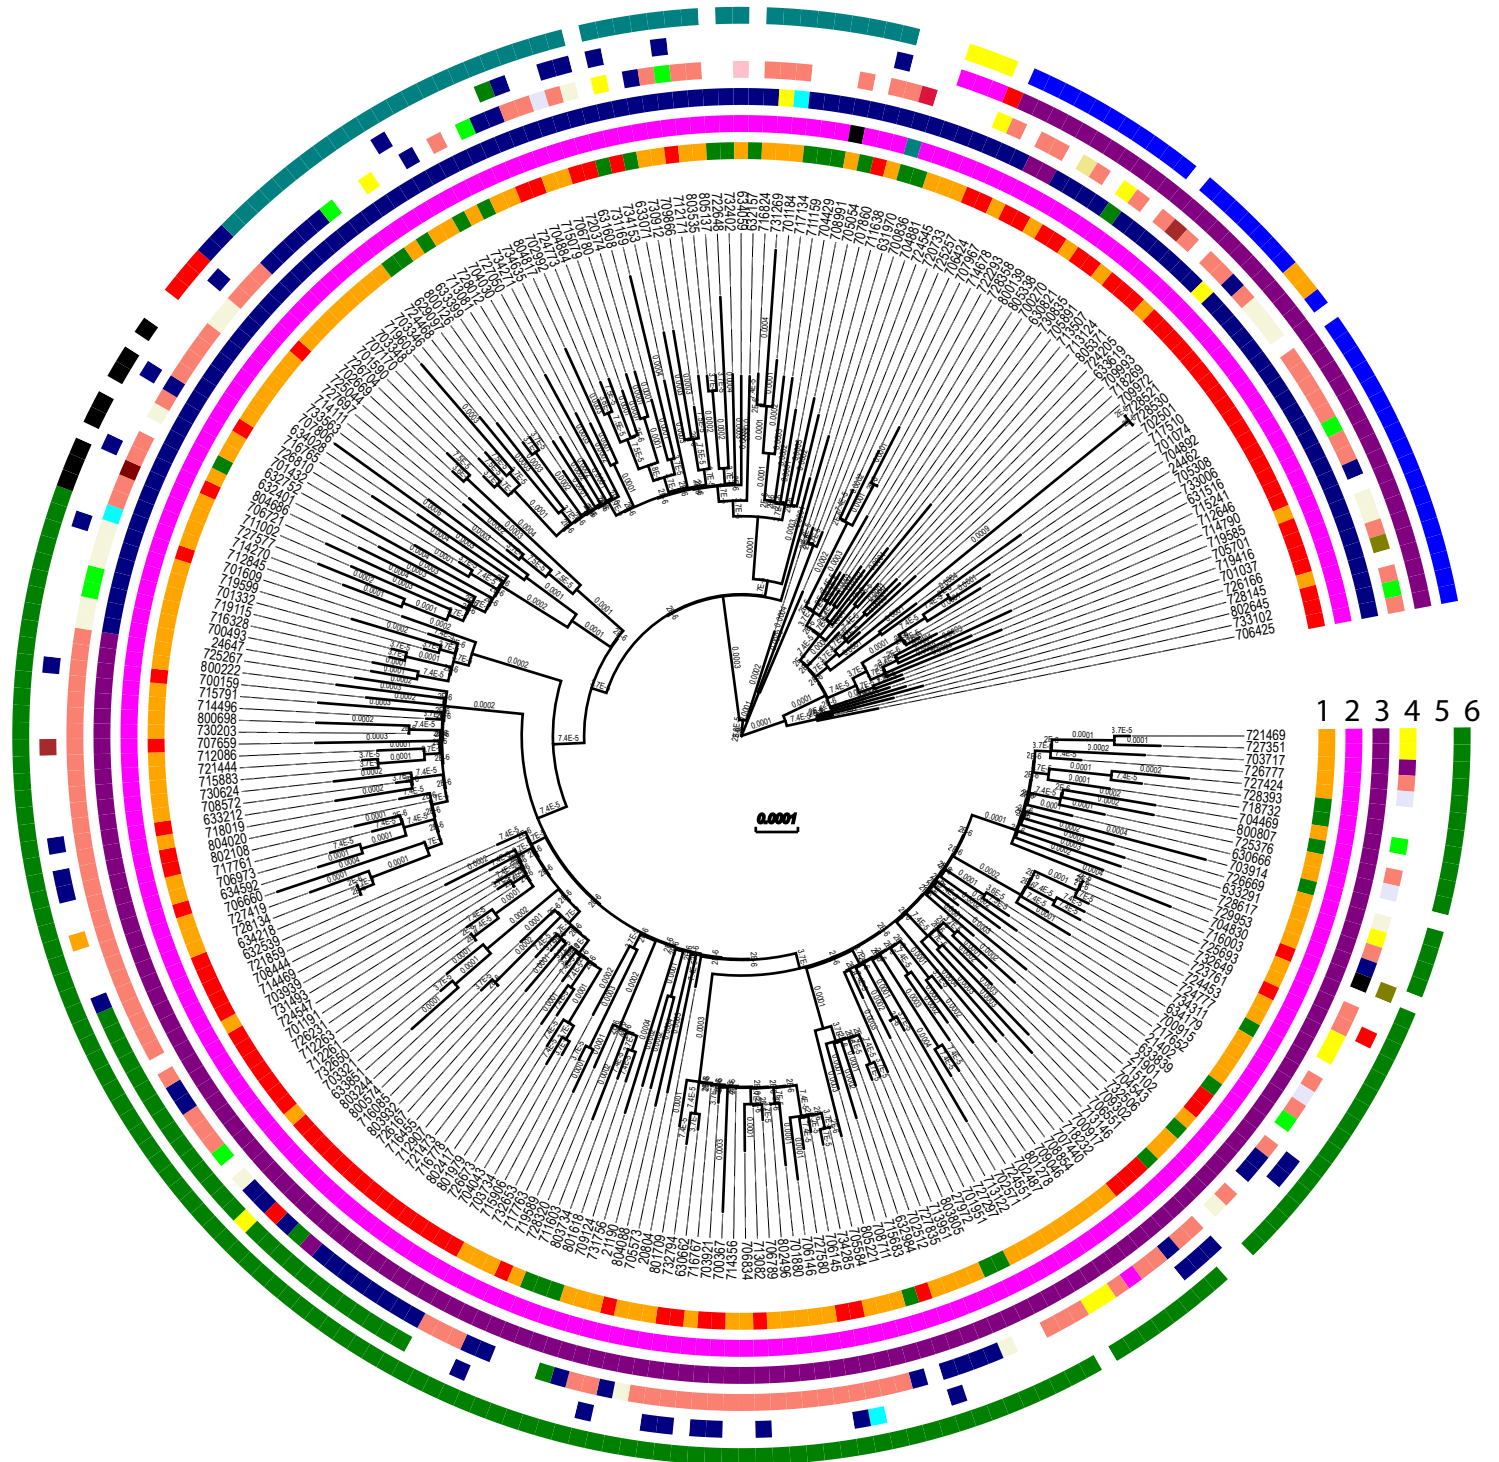

1 2 3 4 5 6

Figure 4

▲ Mira Road

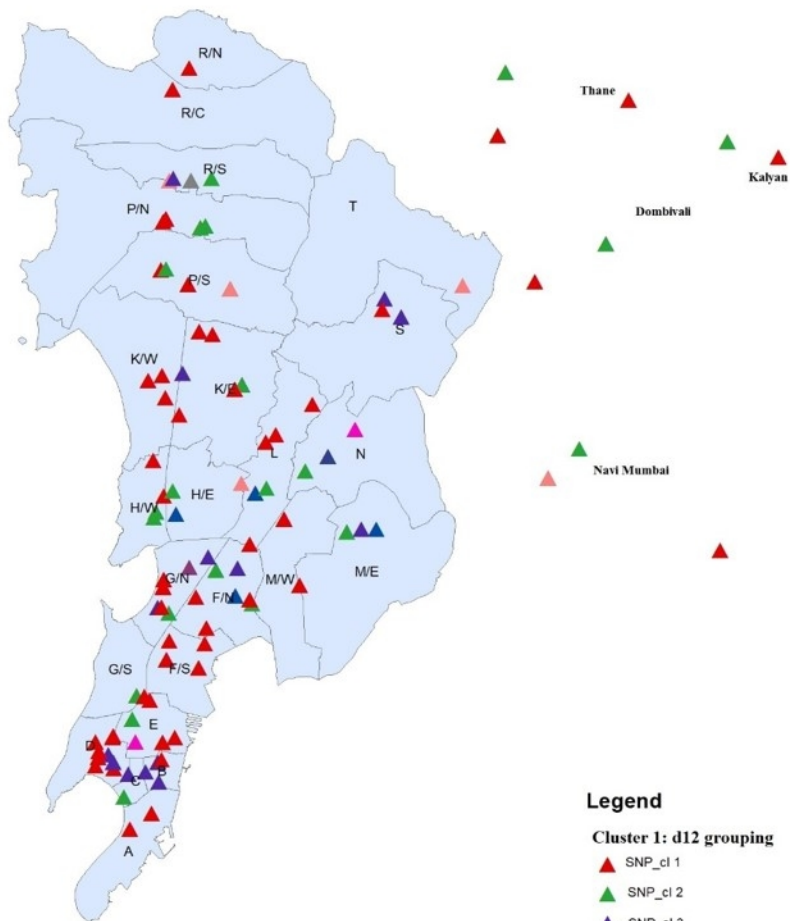

**Legend**

**Cluster 1: d12 grouping**

- ▲ SNP\_cl 1
- ▲ SNP\_cl 2
- ▲ SNP\_cl 3
- ▲ SNP\_cl 4
- ▲ SNP\_cl 5
- ▲ SNP\_cl 6
- ▲ SNP\_cl 7
- ▲ SNP\_cl 8
- ▲ ungrouped
- MumbaiWardMap

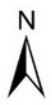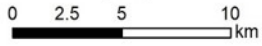



433 **Table 1. Characteristics of MDR and pre-XDR/XDR cases with factors associated with pre-XDR/XDR-**  
 434 **TB based on univariate and multivariate analysis.**

|                           | MDR |      | pre-XDR/XDR |      | Univariate analysis |           |           |         | Multivariate logistic regression |           |           |                  |
|---------------------------|-----|------|-------------|------|---------------------|-----------|-----------|---------|----------------------------------|-----------|-----------|------------------|
|                           | n   | %    | n           | %    | OR                  | 95% lower | 95% upper | P-value | Adjusted OR                      | 95% lower | 95% upper | Adjusted P-value |
| Total                     | 247 | 100% | 770         | 100% |                     |           |           |         |                                  |           |           |                  |
| Gender                    |     |      |             |      |                     |           |           |         |                                  |           |           |                  |
| M                         | 101 | 41%  | 333         | 43%  | 1.09                | 0.82      | 1.46      | 0.55    |                                  |           |           |                  |
| F                         | 145 | 59%  | 437         | 57%  |                     |           |           |         |                                  |           |           |                  |
| unknown                   | 1   | 0%   | 0           | 0%   |                     |           |           |         |                                  |           |           |                  |
| Age                       |     |      |             |      |                     |           |           |         |                                  |           |           |                  |
| <18                       | 34  | 14%  | 96          | 12%  | 0.89                | 0.58      | 1.40      | 0.59    |                                  |           |           |                  |
| 18-40                     | 155 | 63%  | 502         | 65%  | 1.11                | 0.82      | 1.51      | 0.49    |                                  |           |           |                  |
| 40-60                     | 41  | 17%  | 143         | 19%  | 1.15                | 0.77      | 1.72      | 0.51    |                                  |           |           |                  |
| >60                       | 16  | 6%   | 29          | 4%   | 0.57                | 0.29      | 1.14      | 0.08    |                                  |           |           |                  |
| unknown                   | 1   | 0%   | 0           | 0%   |                     |           |           |         |                                  |           |           |                  |
| Lineage                   |     |      |             |      |                     |           |           |         |                                  |           |           |                  |
| Lineage 1 (EAI)           | 37  | 15%  | 13          | 2%   | 0.10                | 0.05      | 0.19      | < 0.001 | 0.18                             | 0.08525   | 0.378876  | < 0.001          |
| Lineage 2 (Beijing)       | 103 | 42%  | 611         | 79%  | 5.36                | 3.90      | 7.39      | < 0.001 | 2.07                             | 1.24238   | 3.461374  | 0.01             |
| Lineage 3 (Delhi-CAS)     | 69  | 28%  | 70          | 9%   | 0.26                | 0.18      | 0.38      | < 0.001 | 0.51                             | 0.30597   | 0.853136  | 0.01             |
| Lineage 4 (Euro-American) | 38  | 15%  | 76          | 10%  | 0.60                | 0.39      | 0.94      | 0.02    |                                  |           |           |                  |
| <i>M. bovis</i>           | 0   | 0%   | 0           | 0%   |                     |           |           |         |                                  |           |           |                  |
| Clustering                |     |      |             |      |                     |           |           |         |                                  |           |           |                  |
| Yes                       | 136 | 55%  | 611         | 79%  | 3.13                | 2.28      | 4.30      | < 0.001 | 0.89                             | 0.59700   | 1.31551   | 0.55             |
| No                        | 111 | 45%  | 159         | 21%  |                     |           |           |         |                                  |           |           |                  |
| Cluster                   |     |      |             |      |                     |           |           |         |                                  |           |           |                  |
| Cluster 1                 | 31  | 13%  | 227         | 29%  | 2.91                | 1.92      | 4.53      | < 0.001 | 1.65                             | 0.98703   | 2.754255  | 0.06             |
| Cluster 2                 | 11  | 4%   | 116         | 15%  | 3.80                | 2.00      | 7.97      | 0.003   | 2.37                             | 1.16704   | 4.831159  | 0.02             |
| Cluster 3                 | 15  | 6%   | 72          | 9%   | 1.59                | 0.88      | 3.06      | 0.12    | 1.08                             | 0.56019   | 2.085229  | 0.82             |

435

436

437 **Supplemental data**

438 Table S1. ENA accession numbers.

439 Table S2. Genes analyzed.

440 Table S3. Characteristics of analyzed samples divided by resistance group.

441 Table S4. Data table

442 Table S5. Multivariate logistic regression results

443

444 **Figure S1.** Geographical distribution of the strains investigated. Strains were plotted on a map  
445 according to the geographical position of the submitting center and color coded by the resistance  
446 category. All categories came from the whole study region.

447 Abbreviations: S- Susceptible to all drugs, nonMDR – resistant but not multi-drug resistant, MDR –  
448 multi-drug resistant, pre-XDR – pre-extensively drug resistant, XDR – extensively drug resistant

449

450 **Figure S2.** Minimum spanning tree based on the analysis of 2 891 alleles of the core genome of the  
451 1 852 *M. tuberculosis* complex strains investigated. Missing values were ignored for pairwise  
452 comparisons. Strains are color-coded by the respective lineage name. EAI and EAI Manila (Lineage 1),  
453 Beijing (Lineage 2), Delhi- CAS (Lineage 3) and Euro- American, H37Rv-like, Haarlem, LAM, mainly T, S-  
454 type, Ural and X-type (Lineage 4). Allele clusters are highlighted by color-shaded branches.

455

456 **Figure S3.** Barplot of resistance profiles of the strains belonging to allele cluster 1, 2 and 3. Resistance  
457 profiles in %. A) Resistance profile of allele Cluster 1, B. Resistance profile of allele Cluster 2, C.  
458 Resistance profile of allele Cluster 3

459 Abbreviations: INH - Isoniazid; RMP - Rifampicin; SM - Streptomycin; EMB - Ethambutol; PZA -  
460 Pyrazinamide; MFX - Moxifloxacin; LFX - Levofloxacin; CFZ - Clofazimine; KAN - Kanamycin; AMI -  
461 Amikacin; CPR - Capreomycin; ETH - Ethionamide; LZD - Linezolid; BDQ - Bedaquiline; CS - Cycloserine;  
462 PAS - para-aminosalicylic acid; DEL - Delamanid

463 **Figure S4.** Maximum likelihood (ML) phylogeny of strains belonging to cluster 2 and 3. Mutations  
464 related to respective drugs and resistance status are color coded on the annotation rings of the tree.  
465 A. ML phylogenetic tree of the 127 MTBC strains from Cluster 2 phylogeny is based on the  
466 concatenated SNP sequence with 1 110 parsimony-informative and 386 singleton sites  
467 B. ML phylogenetic tree of the 87 MTBC strains from Cluster 3, phylogeny is based on the concatenated  
468 SNP sequence with 122 parsimony-informative and 395 singleton sites  
469 Abbreviations: INH - Isoniazid; EMB - Ethambutol; PZA - Pyrazinamide; FQ - Fluoroquinolones.

470
